# Supplementary material
Source: Research Square preprint supplement (doi:10.21203/rs.3.rs-9026837/v1)
Supplement: Supplementary file 1 [file 57d3d218d5edbd6c85cdd58e.docx]

Supplementary Materials

**Enhanced Enzyme-like Activity in Bimetallic Cu-Co Prussian Blue Analogues: Highly Sensitive Glucose Detection and Efficient Antibacterial Applications**

*Yaohua Gu a,1, Xiaoqing Zhang a,1, Gonghui Wang a,1, Kehan Shi a,1, Danian Tian a,*,*

*Keren Shi b, Ruyu Bai c, Mingming Li a,*, Huiqin Yao a,**

*a College of Public Health, General Hospital of Ningxia Medical University, Ningxia Medical University, Yinchuan 750004, China.*

*b State Key Laboratory of High-efficiency Coal Utilization and Green Chemical Engineering,*

*College of Chemistry &Chemical Engineering, Ningxia University, Yinchuan 75002l, China.*

*c Ningxia Fenghua Biotechnology Co., Ltd., Shizuishan 753400, China*

1. **Selective Detection of glucose by Cu-Co PBA**

Different types of reagents (amino acids, common cations, typical reagents) were used to study the selectivity and anti-interference ability of the Cu-Co PBA system in detecting glucose. The final concentrations of glutamic acid (Glu), galactose (Gal), fructose (Fru), lactose (Lactose), uric acid, glucose, Zn2+, K+, Na+, Ca2+, Cu2+, and Mg2+ in the reaction system were 200 mM. The experimental method was similar to that for detecting glucose. After incubation at 35°C and in the dark for 20 minutes, the ultraviolet absorbance value at 652 nm wavelength was recorded. Then, glucose was added to each system and reacted at room temperature and in the dark for 20 minutes. The absorbance value at 652 nm was measured again, and the difference in the two absorbance values was compared.

1. **Cu-Co PBA Stability and Repeatability Test for glucose**

Prepare the Cu-Co PBA samples into suspensions and place them in the air. Every month, use the same method to detect glucose and record the absorbance value at 652 nm. For the Cu-Co PBA + H2O2 + TMB system, after detecting glucose, centrifuge the solution, remove the supernatant, and collect the precipitate. Then reconfigure it into the detection system and continue to detect glucose, repeating this process 5 times. To evaluate the repeatability of the Cu-Co PBA system for glucose detection, repeat the above steps 7 times and record the absorbance value at 652 nm wavelength.

1. **Cu -Co PBA Steady-State Kinetic Analysis**

The enzymatic kinetics were studied by separately changing the concentrations of H2O2 and TMB. The concentrations of TMB and H2O2 were changed respectively, and the absorbance value at UV 652 nm was recorded under optimum temperature and pH conditions. By combining the Michaelis−Menten equation with the Lineweaver−Burk mapping method, the Michaelis constant (Km) and maximum reaction velocity (*V*max) can be determined. The specific experimental steps are as follows: For the TMB study, this is achieved by altering the concentration of TMB in the system. Different concentrations of TMB aqueous solutions (0.25 mM, 0.5 mM, 0.75 mM, 1 mM, 1.25 mM, 1.5 mM, 1.75 mM, 2 mM), Cu-Co PBA nanozyme dispersion solution (40 μg mL–1), H2O2 aqueous solution (1 mM), and buffer solution are added separately. The final volume of the solution is adjusted to 2 mL. The reaction is carried out at room temperature for 10 minutes, and then the absorbance value of the solution is measured. For the H2O2 study, the effect of H2O2 concentration on the catalytic reaction is investigated by changing the concentration of the substrate H2O2 in the mixed system. H2O2 aqueous solutions (0.25 mM, 0.5 mM, 0.75 mM, 1 mM, 1.25 mM, 1.5 mM, 1.75 mM, 2 mM), TMB aqueous solution (1 mM), and Cu-Co PBA nanozyme dispersion solution (40 μg mL–1) are added separately. Then, buffer solution is added to make the total volume 2 mL. After the solution is mixed evenly, it is left to react for 10 minutes, and finally, the absorbance value of the mixed system is measured.

Leveraging the peroxidase-like activity of Cu-Co PBA, additional research was carried out to examine the steady-state kinetic parameters of the POD-like reaction catalyzed by Cu-Co PBA. When other factors are kept constant, the concentrations of the substrate TMB and H2O2 are varied to obtain the relationship between substrate concentration and absorbance change. This relationship is then substituted into the equation of Beer-Lambert's law (Eq. (1)).

(1)

In this equation, ε represents the molar absorbance coefficient of TMB at 652 nm (39,000 M cm–1), b denotes the thickness of the test tube (1.0 cm), and c corresponds to the concentration of ox TMB. The reaction rate v can be determined using the reaction rate equation. The reaction rate v is subsequently integrated into the Michaelis-Menten kinetic equation for the determination of *K*m and *V*max (Eq. (2)).

(2)

In this scenario, [S] denotes the substrate concentration, *K*m represents the Michaelis constant, and *V*max signifies the maximum reaction rate. A lower *K*m indicates a greater affinity between the enzyme and the substrate, thereby enhancing the enzymatic reaction. *V*max represents the reaction rate attained when the substrate concentration is relatively high. A greater *V*max indicates a higher transformation rate and catalytic efficiency.

1. **Scanning electron microscopy of bacterial morphology**

The morphological changes of bacteria were observed using SEM. The experimental procedure was the same as 2.6.4. After the above different treatments, the bacterial solution was centrifuged, and then immersed in a 2.5% glutaraldehyde solution for 6 hours. Subsequently, it was washed 3 times with sterile physiological saline, and then gradually dehydrated with 30%, 40%, 50%, 60%, 70%, 80%, 90% and 100% ethanol solutions for 15 minutes in a gradient. Finally, the freeze-dried bacteria were observed using SEM.
